# Supplementary material
Source: MDPI journal article supplement (https://www.mdpi.com/2227-9717/11/6/1615)
Supplement: s1 [file s1]

## **Supplementary Material**

The combustion of forest humus blended with low-rank coal: Effects of oxygen ratio and blending ratio

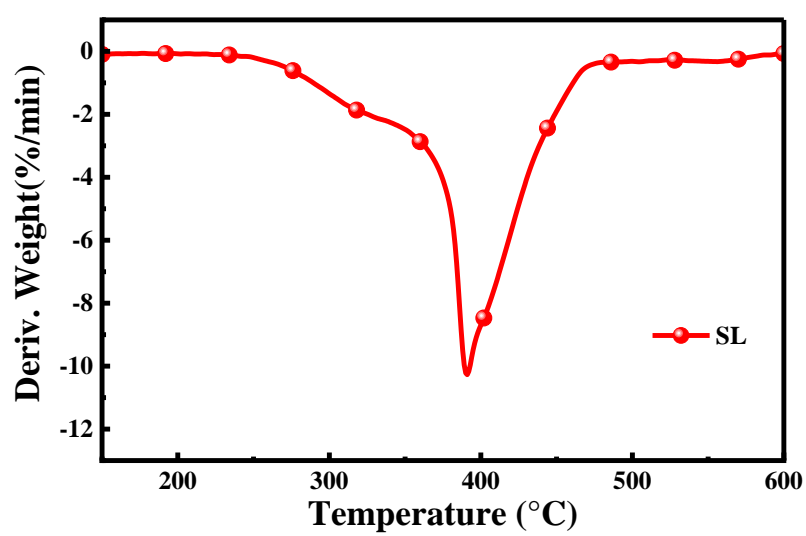

Figure S1. DTG curves of SL.

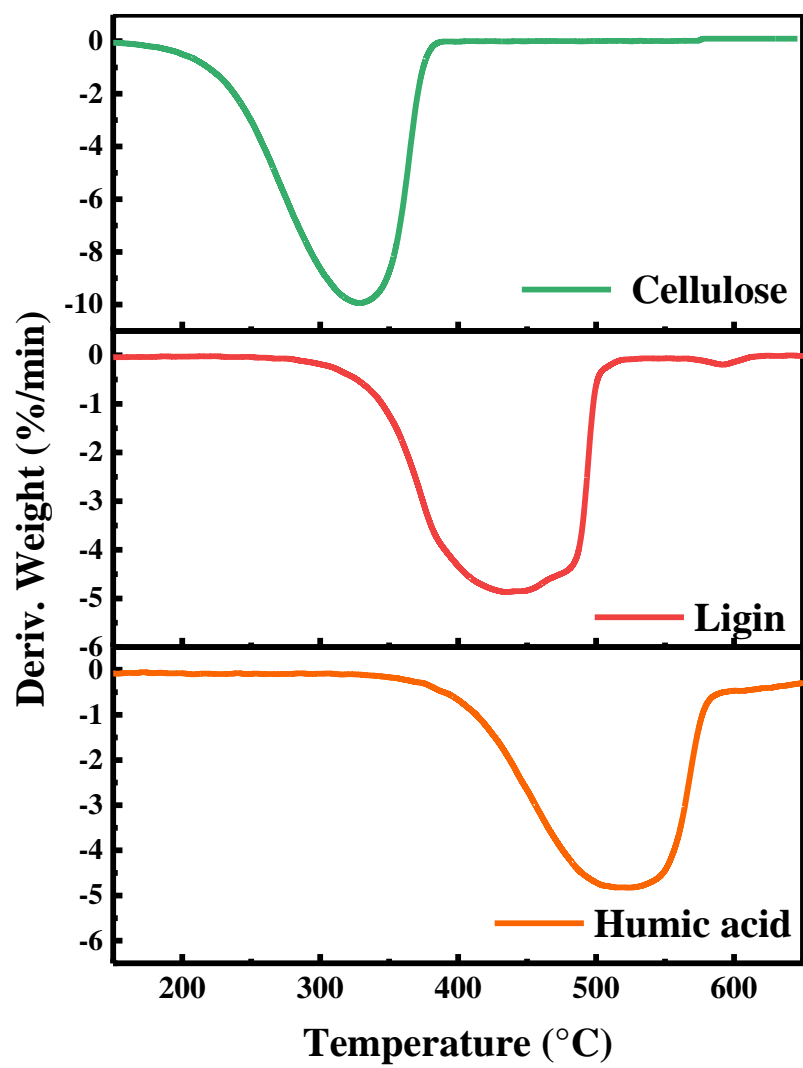

Figure S2. DTG curves of cellulose, lignin and humic acid.

**Table S1.** Combustion characteristic parameters of two blends.

| Sample                                         | $T_i$ (°C) | $T_{p1}$ (°C) | $T_{p2}$ (°C) | $T_{p3}$ (°C) | $T_b$ (°C) | $M_f$ (%) | $\tau$ (min) |
|------------------------------------------------|------------|---------------|---------------|---------------|------------|-----------|--------------|
| NBR50% (O <sub>2</sub> 10%/N <sub>2</sub> 80%) | 368.7      | 330.1         | 396.9         | -             | 671.2      | 20.15     | 30.3         |
| HBR50% (O <sub>2</sub> 10%/N <sub>2</sub> 80%) | 311.7      | 329.4         | 388.5         | 505.4         | 609.5      | 18.86     | 29.8         |
| NBR50% (O <sub>2</sub> 20%/N <sub>2</sub> 80%) | 351.7      | 321.6         | 389.6         | -             | 630.6      | 18.62     | 27.9         |
| HBR50% (O <sub>2</sub> 20%/N <sub>2</sub> 80%) | 305.4      | 321.1         | 378.3         | 498.5         | 580.4      | 17.64     | 27.5         |
| NBR50% (O <sub>2</sub> 40%/N <sub>2</sub> 60%) | 299.5      | 281.3         | 363.8         | -             | 609.3      | 17.08     | 31.0         |
| HBR50% (O <sub>2</sub> 40%/N <sub>2</sub> 60%) | 262.1      | 280.2         | 362.2         | -             | 566.2      | 16.73     | 30.4         |

Note: PN blending ratio of 50% is NBR50%.
